# Supplementary material for: Evaluating the Spike–hACE2 interactions in the wild type and variants of concern of SARS -CoV-2 at different temperatures
Source: Frontiers journal article supplement (doi:10.3389/fphy.2023.1320437), 2024-01-05
Supplement: Data_Sheet_1.docx [file Data_Sheet_1.docx]

**Evaluating the Spike-hACE2 interactions in Wild-type and Variants of Concern of SARS-CoV-2 at different temperatures.**

**Nabanita Mandal and Soumya Lipsa Rath***Department of Biotechnology, National Institute of Technology Warangal, Telangana, India.
*Corresponding Author : [slrath@nitw.ac.in](mailto:slrath@nitw.ac.in)

**Supplementary Information**

**TABLES**

**Table S1:** List of the systems and the simulation time

| **S.No** | **Variants** | **Temperature** | **Simulation Time** |
| --- | --- | --- | --- |
| **1** | **Wild-Type** | 310K  315K  320K  330K  340K | 100 ns  100ns  100ns  100ns  100ns |
| **2** | **Alpha** | 310K  315K  320K  330K  340K | 100 ns  100ns  100ns  100ns  100ns |
| **3** | **Beta** | 310K  315K  320K  330K  340K | 100 ns  100ns  100ns  100ns  100ns |
| **4** | **Gamma** | 310K  315K  320K  330K  340K | 100 ns  100ns  100ns  100ns  100ns |
| **5** | **Delta** | 310K  315K  320K  330K  340K | 100 ns  100ns  100ns  100ns  100ns |
| **6** | **Omicron** | 310K  315K  320K  330K  340K | 100 ns  100ns  100ns  100ns  100ns |

**Figure Captions:**

**Figure S1.** RMSD of RBD of the six variants at different temperatures. 310K is denoted in black colour, 315K is denoted in red colour, 320K is denoted in green colour, 330K is denoted in blue colour and 340K is denoted in magenta colour.

**Figure S2.** RMSD of ACE2 for the six variants at different temperatures. 310K is denoted in black colour, 315K is denoted in red colour, 320K is denoted in green colour, 330K is denoted in blue colour and 340K is denoted in magenta colour. The fluctuations at 340K are comparatively higher than 310K for all of the variants.

**Figure S3.** RMSF of RBM for the six variants at different temperatures. 310K is denoted in black colour, 315K is denoted in red colour, 320K is denoted in green colour, 330K is denoted in blue colour and 340K is denoted in magenta colour.

**Figure S4.** PCA of RBD superimposed at different temperatures for all of the variants. 310K is denoted in black colour, 315K is denoted in red colour, 320K is denoted in green colour, 330K is denoted in blue colour and 340K is denoted in magenta colour.

**Figure S5.** PCA of ACE2 superimposed at different temperatures for all of the variants. 310K is denoted in black colour, 315K is denoted in red colour, 320K is denoted in green colour, 330K is denoted in blue colour and 340K is denoted in magenta colour.

**Figure S6.** Contact Maps of the complex at lowest and highest temperatures. The cut-off for the residue-residue interaction is taken as 8Å and the contacts are shown in blue colour.

**Figure S7.** Variation of the energies at different temperatures for the WT, Alpha, Beta, Gamma, Delta and Omicron


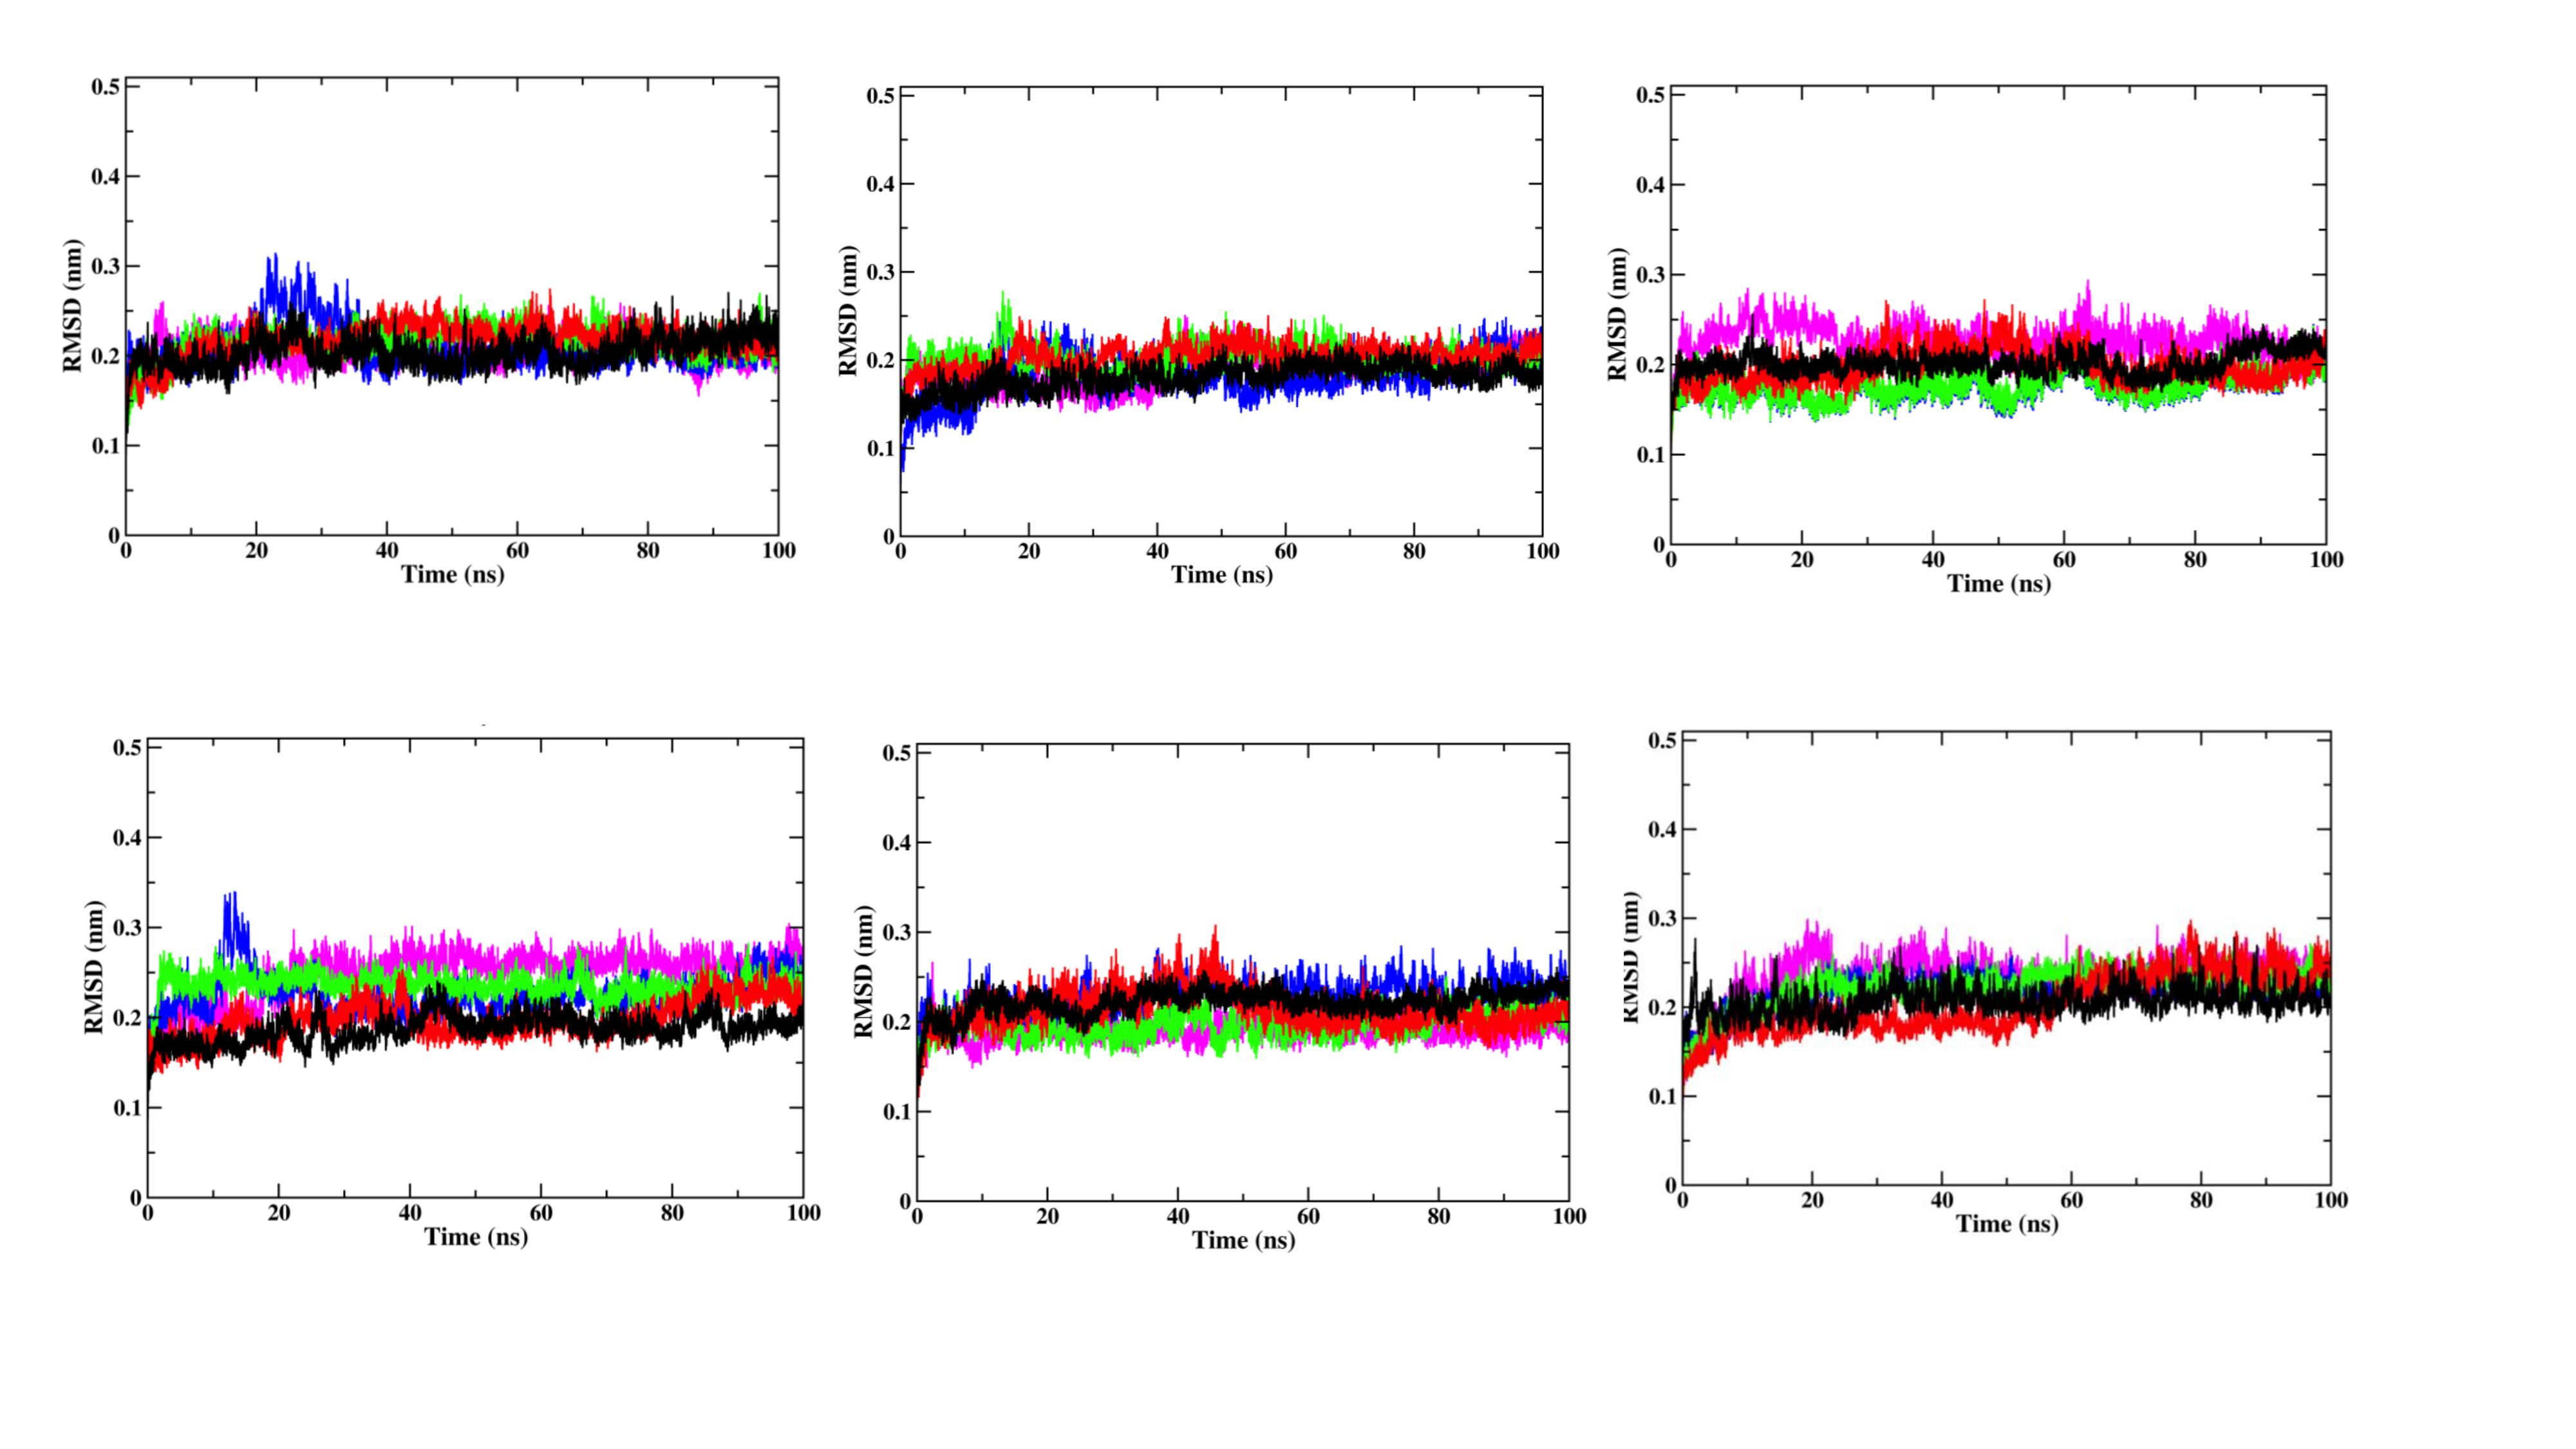


- **Figure S1**

**
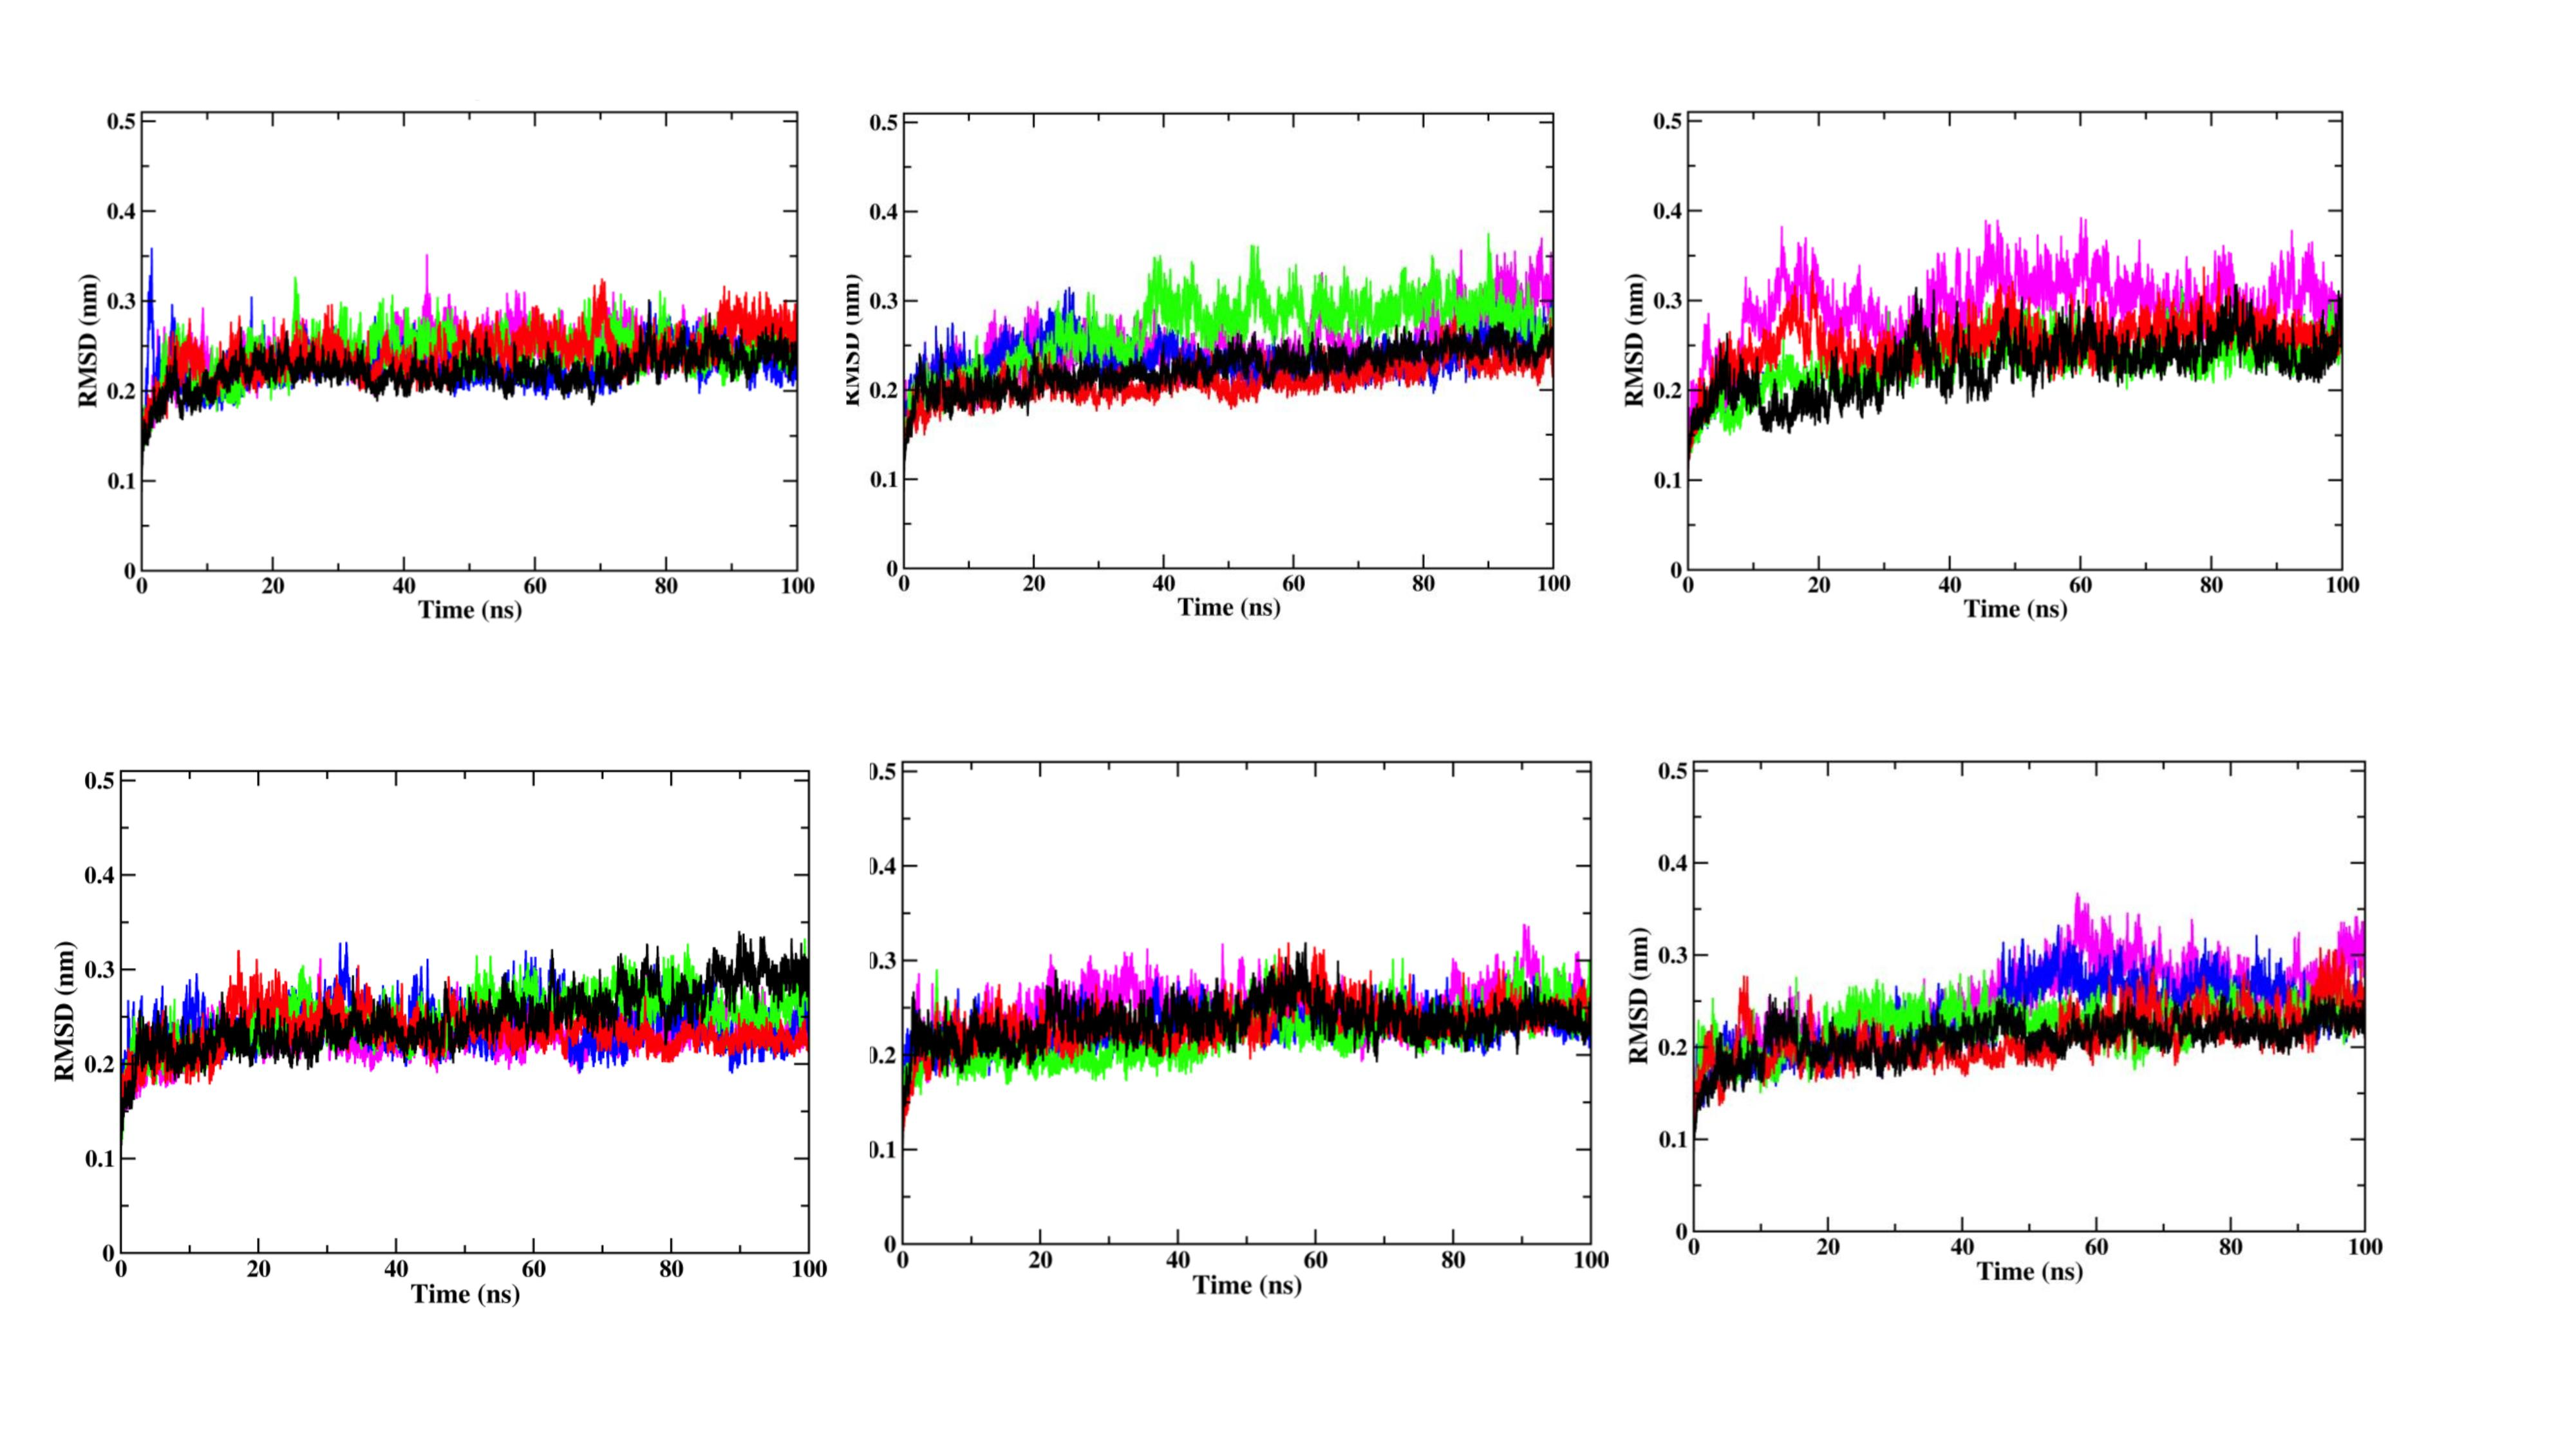
**

**Figure S2**


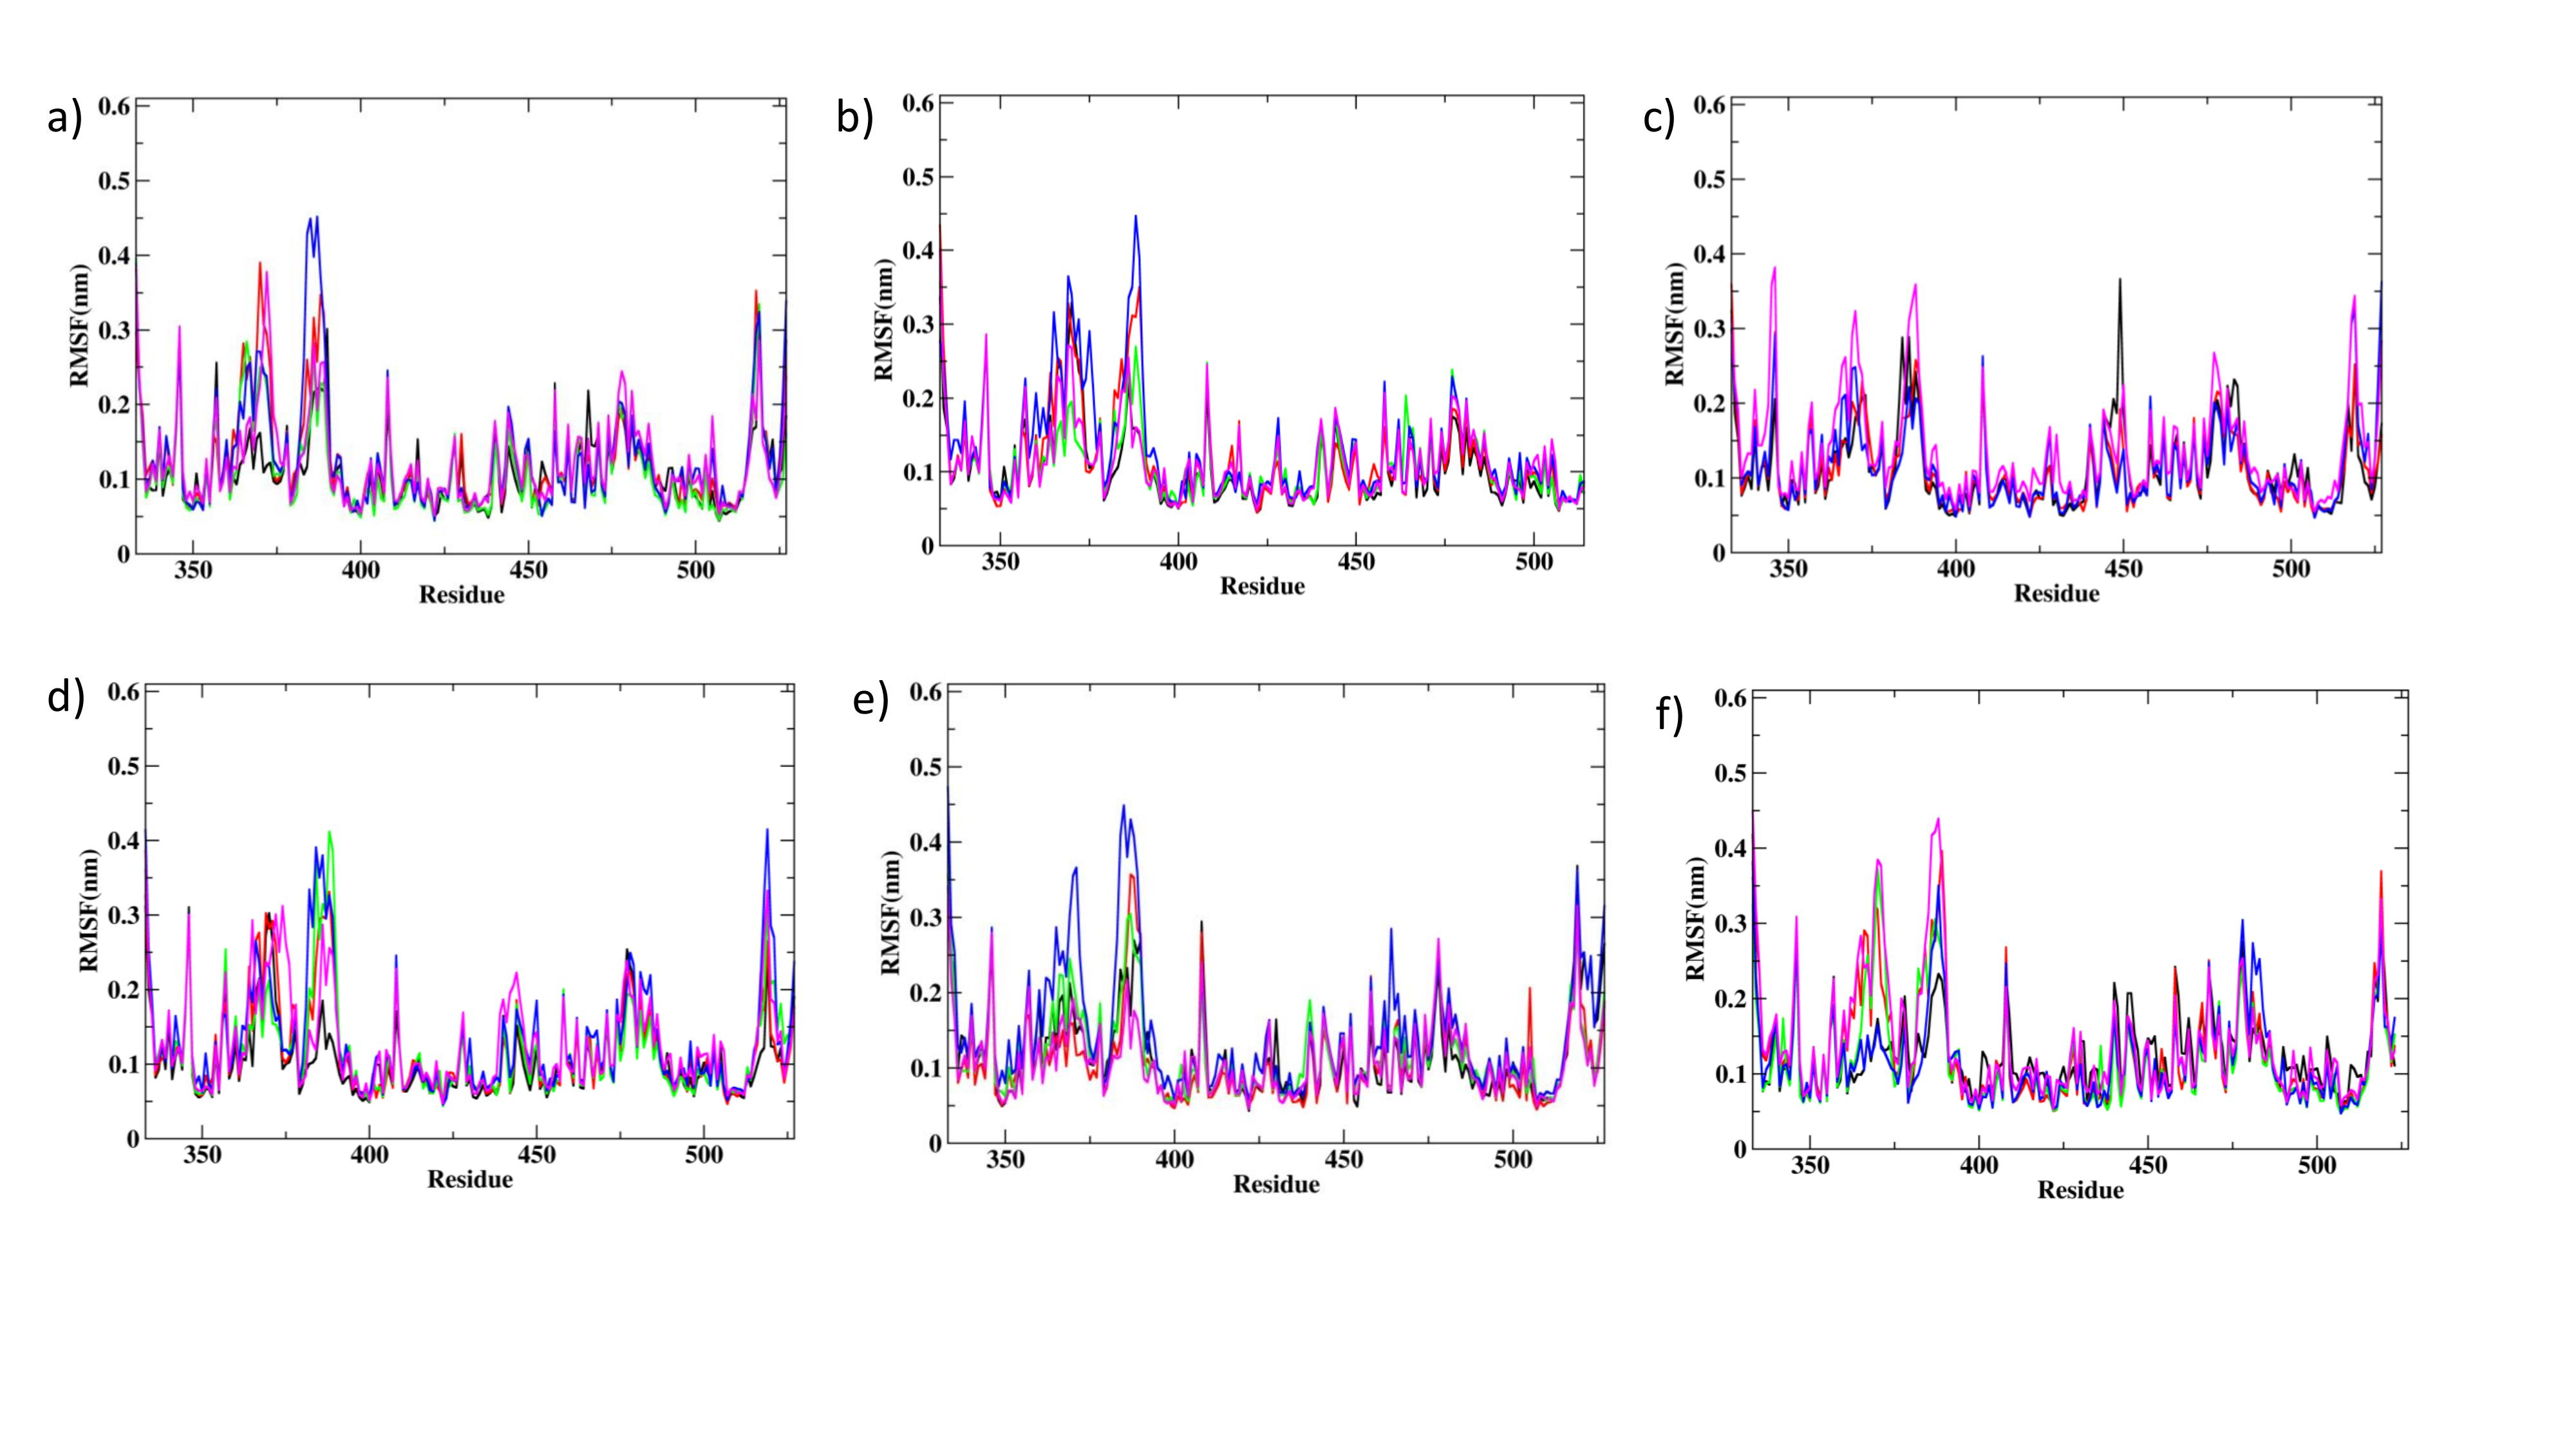


**Figure S3**


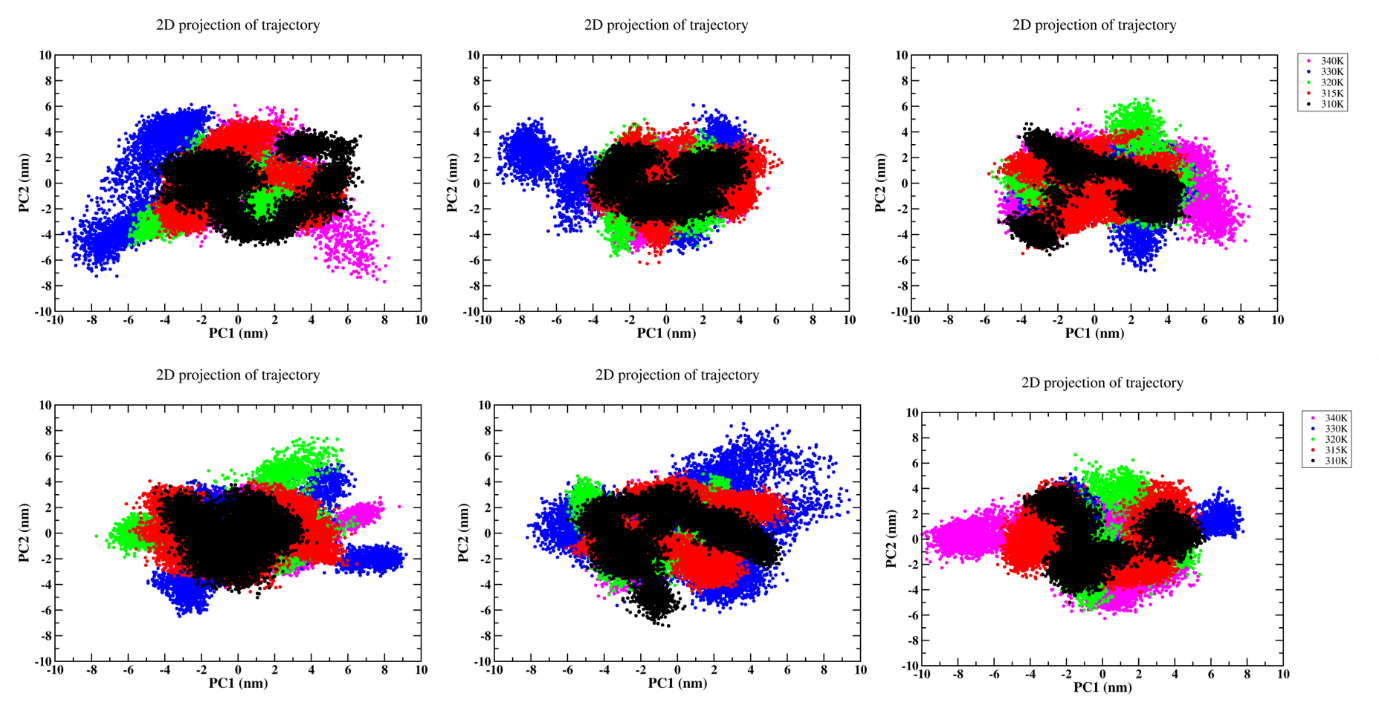


**Figure S4**


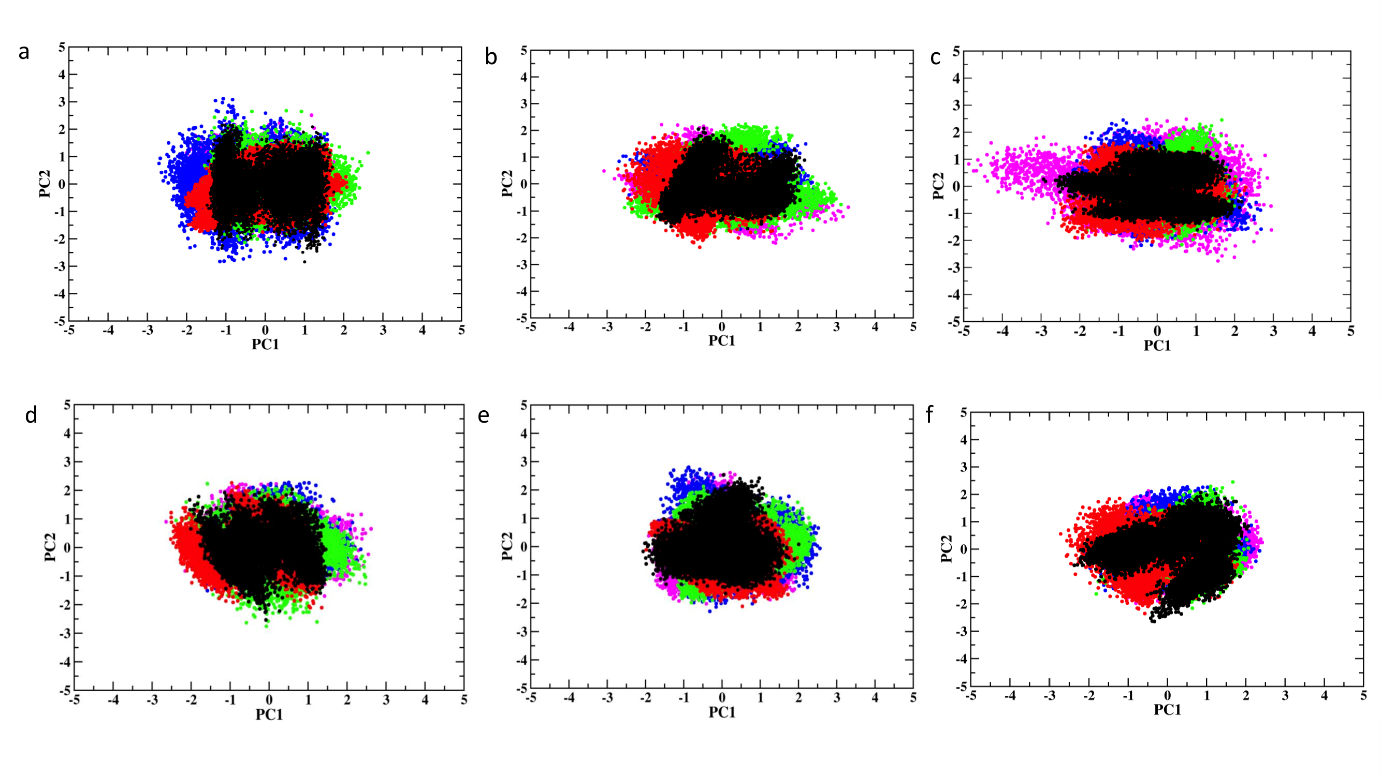


**Figure S5**


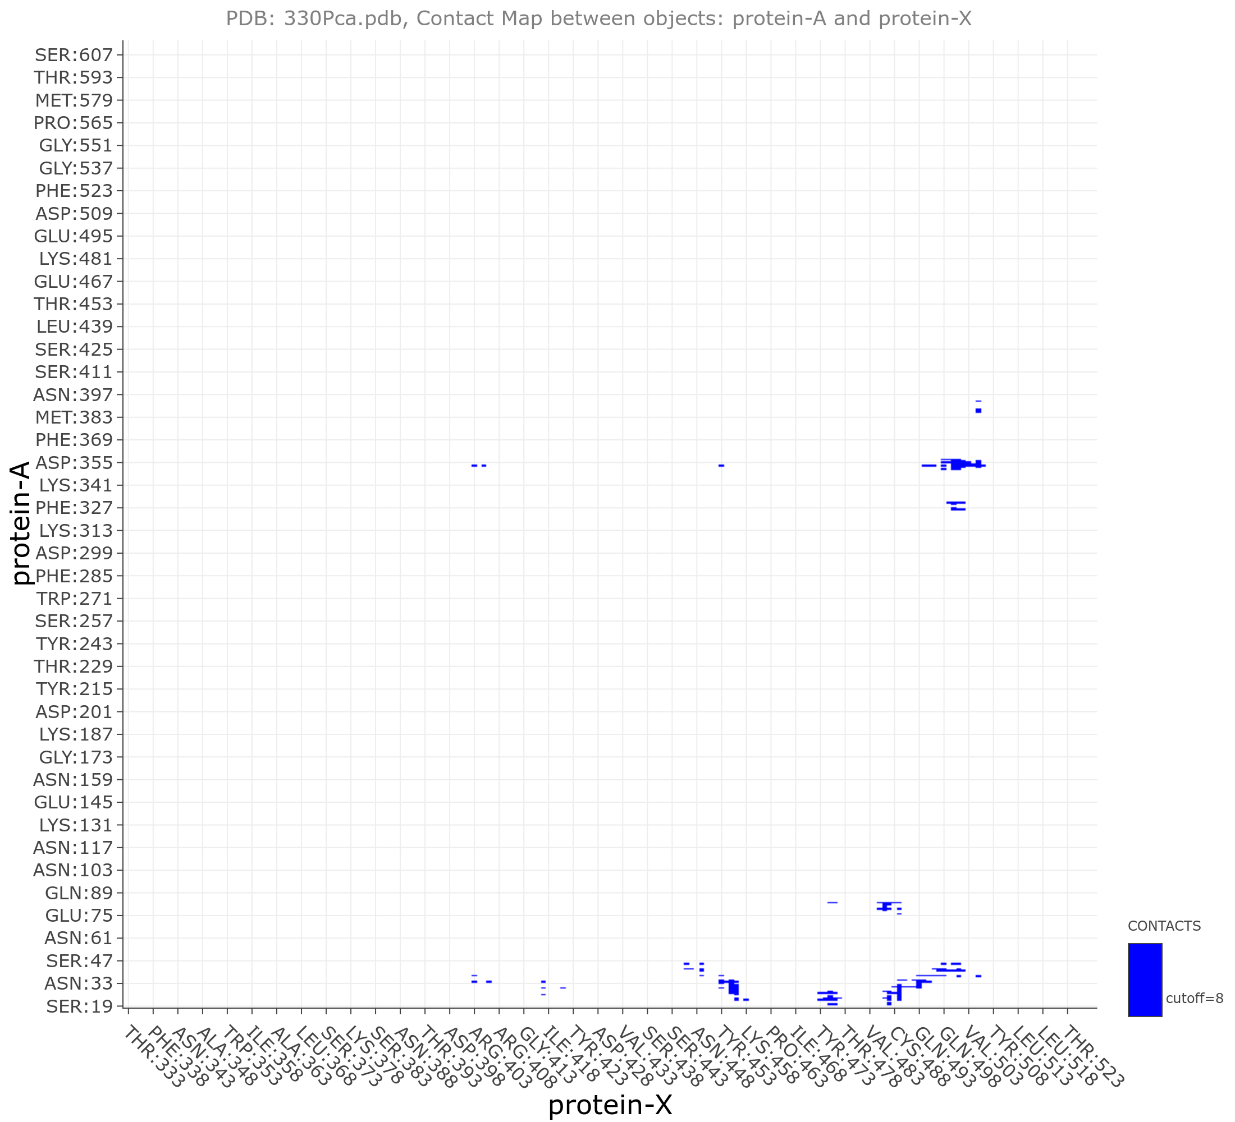


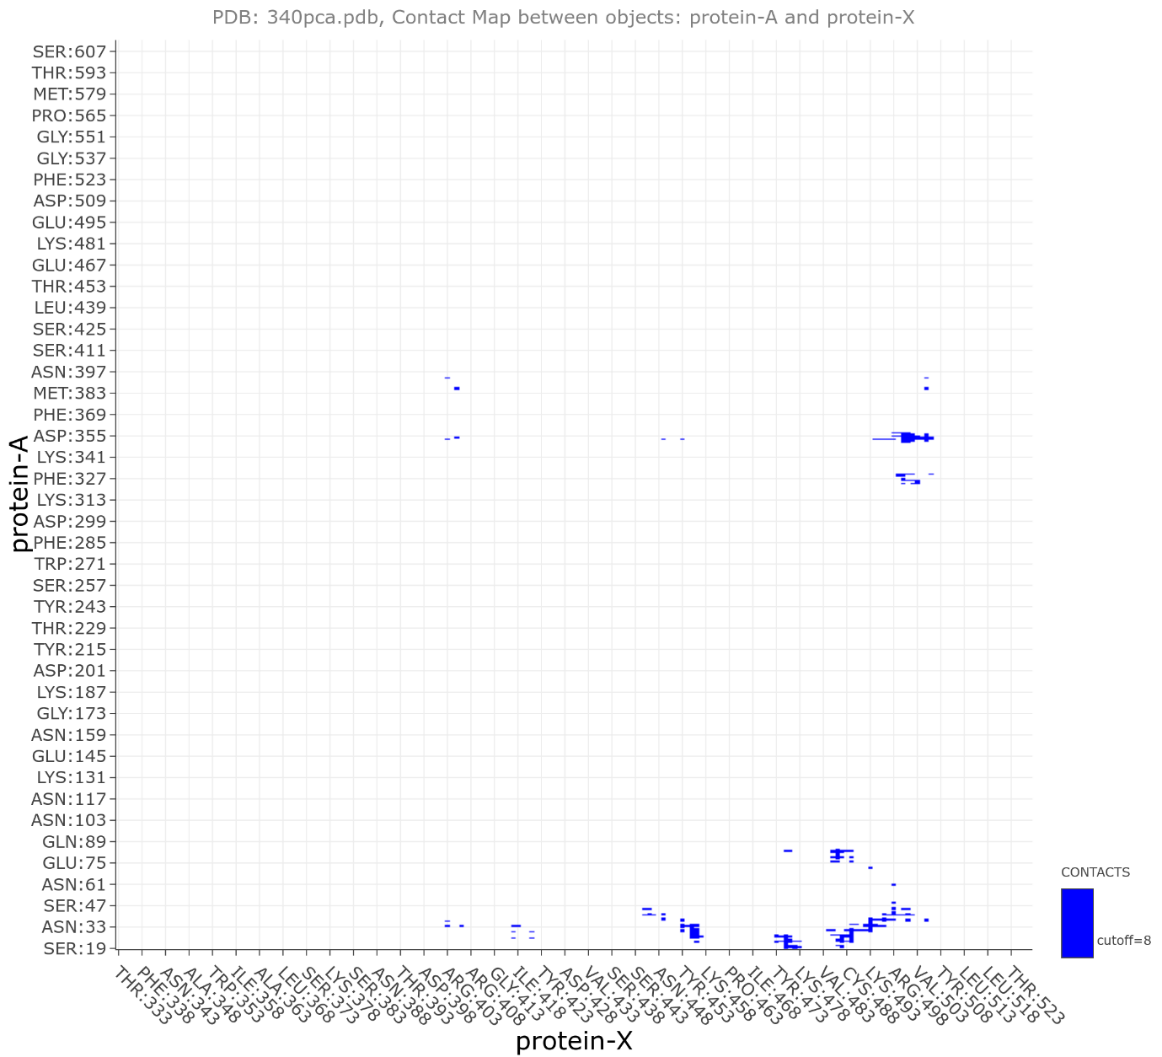


**Figure S6**

**Figure S7**
